# Supplementary material for: A Systematic Map of Genetic Variation in Plasmodium falciparum
Source: PLOS journal article supplement (doi:10.1371/journal.ppat.0020057), 2006-06-19
Supplement: S5 (10.1371/journal.ppat.0020057.s005) [file journal.ppat.0020057.s005]

**Supplemental Table S5** The number of polymorphic probes per cluster of genes expressed at each stage of the *P. falciparum* life cycle. Clusters 1 -15, along with representative genes for each cluster are further described in Le Roch et al. 2003. Essentially, genes were grouped into clusters, based on the expression correlation throughout the *P. falciparum* life cycle, by a robust *k*-means program. While many of the genes belonging to each cluster encode proteins with unknown function, those genes with defined cellular roles permitted a life cycle stage to be attributed to each of the 15 clusters defined. Virtually all known sporozoite-specific genes, such as the circumsporozoite (CS) protein reside within cluster 1 and most genes that have known roles in invasion, such as the merozoite surface proteins (MSPs) are found in cluster 15, validating the cluster assignments.

| Cluster | Total number of genes represented by each cluster | Average number of probes per gene, per cluster | Time of peak expression (representative genes and function)                                                              | Number of SFPs | Total number of probes |
|---------|---------------------------------------------------|------------------------------------------------|--------------------------------------------------------------------------------------------------------------------------|----------------|------------------------|
| 1       | 105                                               | 51.3                                           | Sporozoite (immune evasion)                                                                                              | 1043           | 5396                   |
| 2       | 152                                               | 52.9                                           | Sporozoite / gametocyte (cell cycle regulation)                                                                          | 377            | 8046                   |
| 3       | 218                                               | 48.1                                           | Gametocyte (meiosis)                                                                                                     | 375            | 10494                  |
| 4       | 95                                                | 47.4                                           | Ring (fatty acid metabolism, early transcribed membrane proteins)                                                        | 380            | 4509                   |
| 5       | 109                                               | 41.3                                           | Ring / early trophozoite (protein synthesis)                                                                             | 328            | 6507                   |
| 6       | 167                                               | 55.4                                           | Ring / trophozoite (transcription)                                                                                       | 359            | 9258                   |
| 7       | 93                                                | 43.5                                           | Ring / trophozoite (ribosomal proteins, hexose metabolism, knob associated histidine rich protein, trophozoite antigens) | 281            | 4050                   |
| 8       | 125                                               | 46.4                                           | Trophozoite/ gametocyte (immune evasion: maurer's cleft proteins)                                                        | 322            | 5800                   |
| 9       | 120                                               | 37.5                                           | Trophozoite/ gametocyte (cell-cycle regulation)                                                                          | 130            | 4510                   |
| 10      | 225                                               | 57.1                                           | Trophozoite (DNA replication/mitotic cell cycle)                                                                         | 430            | 12866                  |
| 11      | 110                                               | 65.1                                           | Trophozoite (DNA replication/mitotic cell cycle)                                                                         | 236            | 7170                   |
| 12      | 238                                               | 49.3                                           | Trophozoite (DNA replication/mitotic cell cycle)                                                                         | 373            | 11751                  |
| 13      | 180                                               | 68.4                                           | Schizont / gametocyte (DNA replication)                                                                                  | 484            | 12329                  |
| 14      | 163                                               | 68.8                                           | Sporozoite / schizont / gametocyte (actin filament-based processes)                                                      | 541            | 11216                  |
| 15      | 130                                               | 64.3                                           | Schizont (invasion)                                                                                                      | 644            | 8368                   |
