# Supplementary material for: A Systematic Map of Genetic Variation in Plasmodium falciparum
Source: PLOS journal article supplement (doi:10.1371/journal.ppat.0020057), 2006-06-19
Supplement: S13 (10.1371/journal.ppat.0020057.s013) [file journal.ppat.0020057.s013]

**Supplemental Table S13** Description of the genes deleted in the *P. falciparum* strains analyzed; Deletions are only reported for genes

with  $\geq$  six probes. No deletions in strain D6 were observed.

[illegible]

| PlasmoDB_ID | Gene_ID | Description                                                | Strain |       |       |       |       |     |     |      |     |     |      |     |    |
|-------------|---------|------------------------------------------------------------|--------|-------|-------|-------|-------|-----|-----|------|-----|-----|------|-----|----|
|             |         |                                                            | 18.02  | 31.01 | 41.02 | 48.02 | 51.02 | 3D7 | 7G8 | C188 | Dd2 | FCB | FCR3 | HB3 | W2 |
| PFD1205w    |         | Predicted integral membrane protein                        |        | 1     |       |       |       |     |     |      |     |     |      |     |    |
| PFD1210w    | 812411  | Uncharacterized protein                                    |        | 1     |       |       |       |     |     |      |     |     |      |     |    |
| PFI1475w    | 812412  | Merozoite surface protein 1, precursor*                    |        |       |       |       |       |     |     |      |     |     |      | 1   |    |
| PFI1710w    | 813575  | Cytoadherence-linked protein                               |        |       |       |       |       |     |     |      |     | 1   | 1    |     |    |
| PFI1785w    | 813622  | Uncharacterized protein                                    |        |       |       |       |       |     |     |      |     | 1   | 1    |     |    |
| PFI1800w    | 813637  | Enzyme, putative                                           |        |       |       |       |       |     |     |      |     | 1   | 1    |     |    |
| PFL2360w    | 813640  | Uncharacterized protein                                    |        |       |       |       |       | 1   |     |      |     | 1   |      |     |    |
| PFL2550w    | 811524  | Uncharacterized protein, conserved in <i>P. falciparum</i> |        |       |       |       |       |     |     |      | 1   |     |      |     |    |
| PFL2555w    | 811560  | Uncharacterized protein                                    |        |       |       |       |       |     |     |      | 1   |     |      |     |    |
| PFL2565w    | 811561  | Uncharacterized protein                                    |        |       |       |       |       |     |     |      |     |     |      | 1   |    |
| PFL2570w    | 811563  | Acyl-coa ligase antigen                                    |        |       |       |       |       |     |     |      |     |     |      | 1   |    |
| PFL2580w    | 811564  | Uncharacterized protein                                    |        | 1     |       |       | 1     |     |     |      | 1   |     |      |     | 1  |

#### Footnotes

\* Visual examination of the hybridization pattern of MSP-1 indicates a partial deletion or substitution.

Gene IDs were derived from Entrez Gene at NCBI (<http://www.ncbi.nlm.nih.gov/entrez/query.fcgi?db=gene>).
